# Supplementary material
Source: publisher figshare collection journal article supplement (https://tandf.figshare.com/ndownloader/files/23613073)
Supplement: Supplementary file 1 [file 23613073]

One-pot Cascade Ring Enlargement of Isatin-3-Oximes to 2,4-Dichloroquinazolines Mediated by Bis(trichloromethyl)carbonate and Triarylphosphine Oxide

Jinjing Qin, Zhenhua Li*, Shengzhe Ma, Lixian Ye, Guoqiang Jin and Weike Su

College of Pharmaceutical Sciences, Zhejiang University of Technology, Hangzhou 310014, P.R. China

Email: lizhenhua@zjut.edu.cn

**Supplemental Materials**

***Characterization data of 2***

### 2,4-Dichloroquinazoline (2a)

Light yellow solid, 93% yield, mp 119-121 oC (Lit.,[1] mp 118 oC). 1H NMR (400MHz, CDCl3) δ: 8.26 (d, *J* = 8.4 Hz, 1H), 8.01 – 7.97 (m, 2H), 7.76 – 7.70 (m, 1H). *13*C NMR (100 MHz, CDCl3) δ: 163.7, 154.9, 152.1, 135.9, 129.0, 127.8, 125.8, 122.2.

### 2,4-6-methoxyDichloroquinazoline (2b)

Light yellow solid, 94% yield, mp 170-171 °C (Lit.,[2] mp 171 oC). 1H NMR (400 MHz, CDCl3) δ: 7.89 (d, *J* = 9.2 Hz, 1H), 7.60 (dd, *J* = 9.2, 2.8 Hz, 1H), 7.40 (d, *J* = 2.8 Hz, 1H), 3.99 (s, 3H). 13C NMR (100 MHz, CDCl3) δ: 161.5, 159.4, 152.5, 148.4, 129.3, 129.0, 123.3, 102.7, 56.0.

### 2,4-Dichloro-6-methylquinazoline (2c)

White solid, 93% yield, mp 140-141 °C (Lit.,[3] mp 140-141 °C). 1H NMR (400 MHz, CDCl3) δ: 8.00 (s, 1H), 7.88 (d, *J* = 8.6 Hz, 1H), 7.80 (dd, *J* = 8.6, 1.8 Hz, 1H), 2.61 (s, 3H). 13C NMR (100 MHz, CDCl3) δ: 162.9, 154.0, 150.7, 139.8, 138.2, 127.5, 124.5, 122.1, 22.0.

### 2,4-Dichloro-6,7-dimethoxyquinazoline (2d)

White solid, 92% yield, mp 161-162 °C (Lit.,[2] mp 157-159 °C). 1H NMR (400 MHz, CDCl3) δ: 7.33 (s, 1H), 7.25 (s, 1H), 4.07 (s, 3H), 4.05 (s, 3H). 13C NMR (100 MHz, CDCl3) δ: 159.9, 157.6, 153.4, 151.4, 150.4, 117.7, 106.2, 102.7, 56.8, 56.5.

### 2,4-Dichloro-5,7-dimethyquinazoline (2e)

White solid, 92% yield, mp 141-142 oC (Lit.,[4] mp 140-143 oC). 1H NMR (400 MHz, CDCl3) δ: 7.59 (s, 1H), 7.30 (s, 1H), 2.96 (s, 3H), 2.52 (s, 3H). 13C NMR (100 MHz, CDCl3) δ: 162.2, 154.6, 154.0, 146.5, 136.2, 134.2, 125.7, 120.0, 24.8, 21.9.

### 2,4,6-Trichloroquinazoline (2f)

White solid, 88% yield, mp 132-136°C (Lit.,[1] mp 129-131 °C). 1H NMR (400 MHz, CDCl3) δ: 8.22 (d, *J* = 2.0 Hz, 1H), 7.98 – 7.88 (m, 2H). 13C NMR (100 MHz, CDCl3) δ: 162.6, 155.2, 150.6, 136.9, 135.1, 129.5, 124.7, 122.8.

### 2,4,8-Trichloroquinazoline (2g)

Light yellow solid, 87% yield, mp 152-153 °C (Lit.,[5] mp 151-153 °C). 1H NMR (400 MHz, CDCl3) δ: 8.19 (dd, *J* = 8.8, 1.2 Hz, 1H), 8.07 (dd, *J* = 7.6, 1.2 Hz, 1H), 7.65 (dd, *J* = 8.2, 7.8 Hz, 1H). 13C NMR (100 MHz, CDCl3) δ: 164.2, 155.8, 148.9, 135.7, 132.6, 128.8, 124.7, 123.4.

### 2,4-Dichloro-7-fluoroquinazoline (2h)

White solid, 74% yield, mp 143-145 °C (Lit.,[5] mp 142-145 °C). 1H NMR (400 MHz, CDCl3) δ: 8.29 (dd, *J* = 8.6, 5.8 Hz, 1H), 7.62 (d, *J* = 8.8 Hz, 1H), 7.49 (t, *J* = 8.6 Hz, 1H). 13C NMR (100 MHz, CDCl3) δ: 161.5 (d, *J*1 = 295 Hz), 158.1, 150.9, 148.7 (d, *J*3 = 14 Hz), 123.8(d, *J*3= 11 Hz), 114.5 , 114.2 (d, *J*3=16 Hz), 106.9 (d, *J*2 = 28 Hz).

### 2,4-Dichloro-6-fluoroquinazoline (2i)

White solid, 85% yield, mp 136-137 °C (Lit.,[1] mp 136-137 °C). 1H NMR (400 MHz, CDCl3) δ: 8.03 (dd, *J* = 9.2, 4.8 Hz, 1H), 7.87 (dd, *J* = 8.0, 2.8 Hz, 1H), 7.75 (td, *J* =8.0, 2.8 Hz, 1H). 13C NMR (100 MHz, CDCl3) δ: 163.0 (d, *J*4 = 6 Hz), 161.1 (d, *J*1 = 252 Hz), 154.5 (d, *J*4 = 3 Hz), 149.2, 130.7 (d, *J*4 = 9 Hz), 126.4 (d, *J*2 = 26 Hz), 123.1 (d, *J*3 = 10 Hz), 109.7 (d, *J*2 = 24 Hz).

### 2,4-Dichloro-6-bromoquinazoline (2j)

White solid, 71% yield, mp 134-135 °C (Lit.,[6] mp 131-136 °C). 1H NMR (400MHz, CDCl3) δ: 8.40 (d, *J* = 2.0Hz, 1H), 8.04 (dd, *J* = 8.8, 2.0 Hz, 1H), 7.86 (d, *J* = 8.8 Hz, 1H); 13C NMR (100 MHz, CDCl3) δ: 162.5, 155.2, 150.8, 139.5, 129.5, 128.0, 123.2, 123.1.

### 2,4-Dichloro-6-nitroquinazoline (2k)

White solid, 63% yield, mp 121-123 °C (Lit.,[5] mp 122-124 °C). 1H NMR (400MHz, CDCl3) δ: 9.16 (dd, *J* = 2.4, 0.4 Hz, 1H), 8.73 (dd, *J* = 9.2, 2.4 Hz, 1H), 8.16 (dd, *J* = 9.2, 0.4 Hz, 1H); 13C NMR (100 MHz, CDCl3) δ: 162.3, 155.1, 151.0, 139.3, 129.3, 128.0, 123.0, 122.9.

### 2,4,5,7-Tetrachloroquinazoline (2l)

White solid, 66% yield, mp 100-101 °C. (Lit.,[5] mp 100-101 °C). 1H NMR (400MHz, CDCl3) δ: 7.90 (d, *J* = 2.0 Hz, 1H), 7.73 (d, *J* = 2.0 Hz, 1H). 13C NMR (100 MHz, CDCl3) δ: 162.0, 156.0, 154.5, 141.3, 132.5, 126.8, 118.8.

### 2,4-Dichloro-8-bromoquinazoline (2m)

White solid, 71% yield. mp 146-147 °C. (Lit.,[5] mp 146-147 °C). 1H NMR (400 MHz, CDCl3) δ: 8.27 (m, 2H), 7.60 (dd, J = 8.3, 7.7 Hz, 1H). 13C NMR (100 MHz, CDCl3) δ: 164.6, 156.2, 150.1, 139.6, 129.6, 125.8, 123.7, 123.2.

### 2,4,6-Trichloro-8-methylquinazoline (2n)

White solid, 82% yield. mp 143-144 °C. (Lit.,[1] mp 143-145°C). 1H NMR (400 MHz, CDCl3) δ: 8.04 (d, J = 2.0 Hz, 1H), 7.78 – 7.70 (m, 1H), 2.71 (s, 3H). 13C NMR (100 MHz, CDCl3) δ: 163.1, 154.5, 150.4, 139.4, 136.7, 134.7, 123.1, 122.5, 17.4.

***Characterization data of 3***

### Tris(4-methylphenyl)phosphine oxide (3b)

Colourless solid, 39% yield. mp 141-144 oC. (lit.[7] mp 140 oC). 1H NMR (400 MHz, CDCl3) δ: 7.53 (dd, J = 11.8, 8.0 Hz, 6H), 7.26 – 7.22 (m, 6H), 2.38 (s, 9H).

### Tris(3,4,5-trifluorophenyl)phosphine oxide (3c)

Colourless solid, 36% yield. mp 211-218 oC.( (lit.[7] mp 219-221 oC). 1H NMR (400 MHz, CDCl3) δ: 7.34 – 7.21 (m, 6H).

### Tris(4-methoxylphenyl)phosphine oxide (3d)

Colourless solid, 39% yield. mp 142-144 oC. (lit.[7] mp 142-143 oC). 1H NMR (400 MHz, Chloroform-*d*) δ 7.61 – 7.50 (m, 6H), 6.99 – 6.89 (m, 6H), 3.84 – 3.80 (m, 9H).

### Tris([1,1’-biphenyl]-4-yl)phosphine oxide (3e)

Colourless solid, 33% yield. mp 230-238 oC. (lit.[7] mp 233-234 oC). 1H NMR (400 MHz, Chloroform-*d*) δ 7.83 (dd, *J* = 11.5, 8.2 Hz, 6H), 7.76 – 7.68 (m, 6H), 7.63 (d, *J* = 7.4 Hz, 6H), 7.47 (t, *J* = 7.4 Hz, 6H), 7.40 (t, *J* = 7.3 Hz, 3H).

***Copies of 1H NMR and 13C NMR spectra***

**Figure S 1:** 1H NMR of **2a**


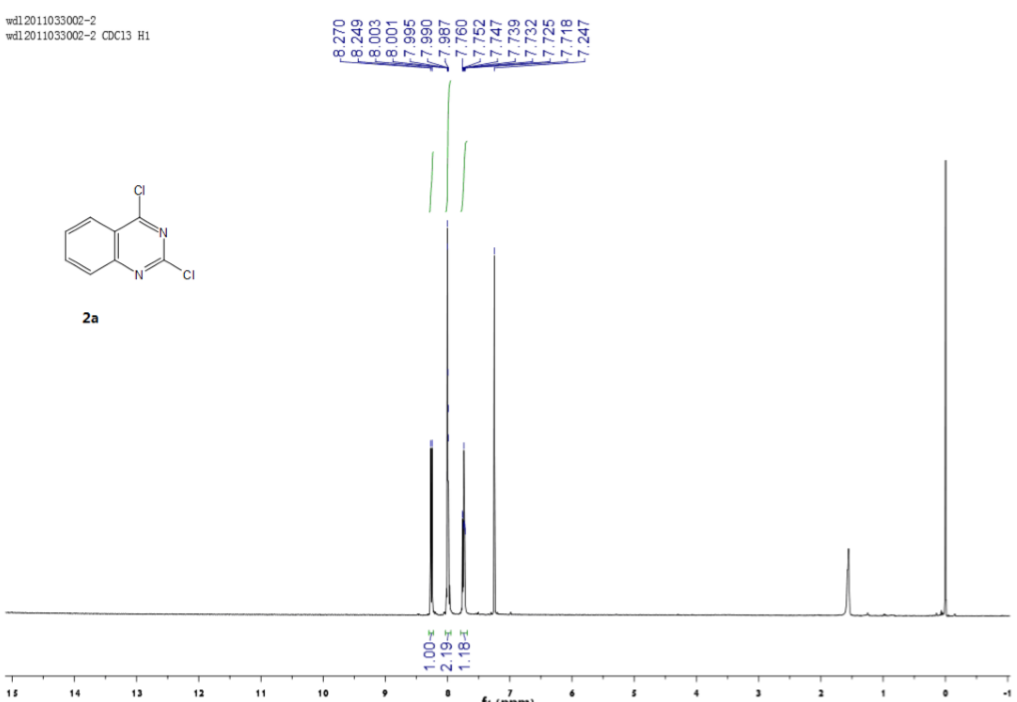


**Figure S 2:** 13C NMR of **2a**


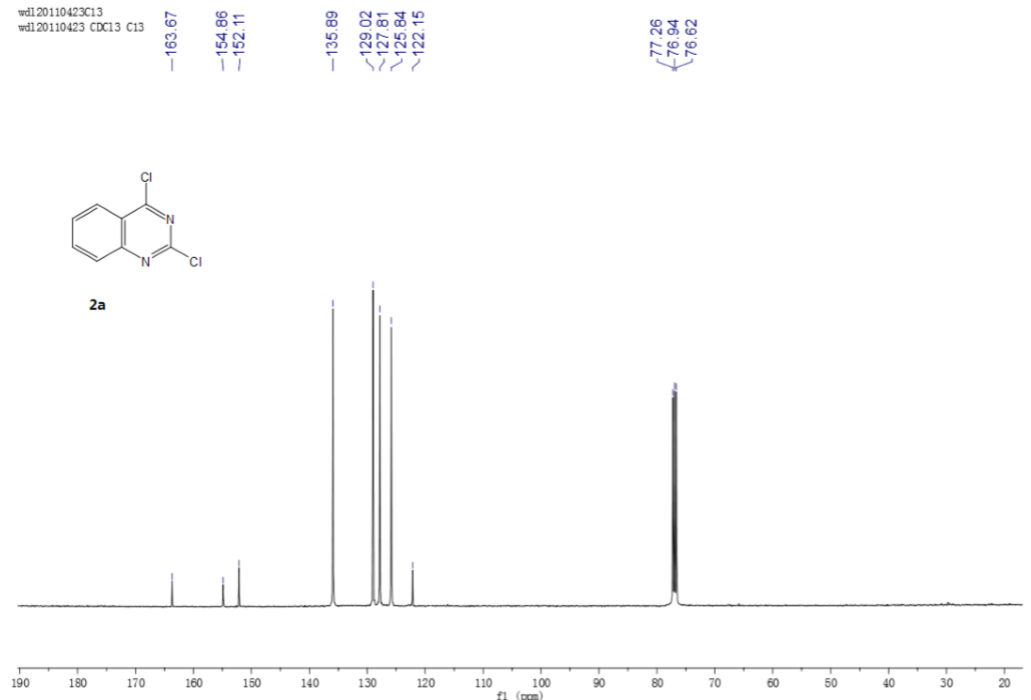


**Figure S 3:** 1H NMR of **2b**


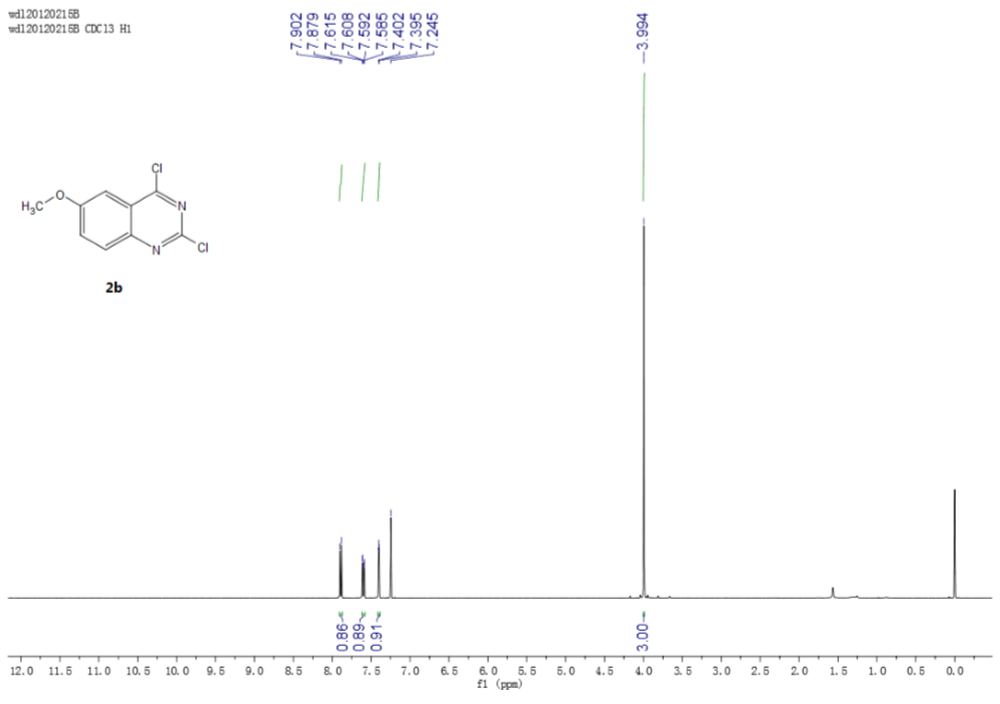


**Figure S 4:** 13C NMR of **2b**


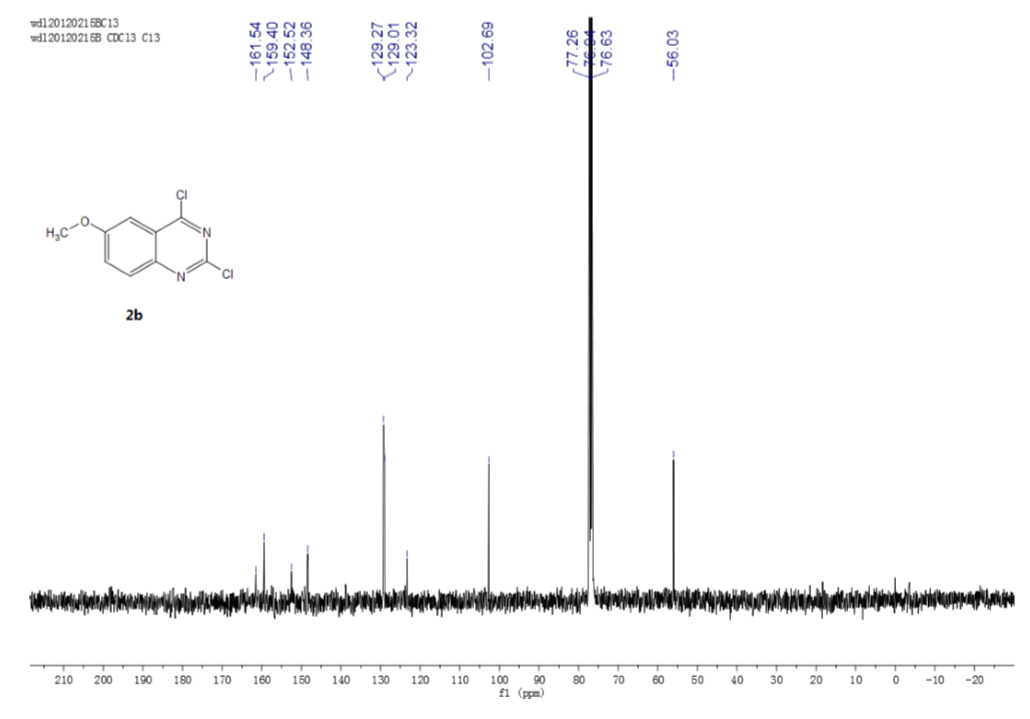


**Figure S 5:** 1H NMR of **2c**


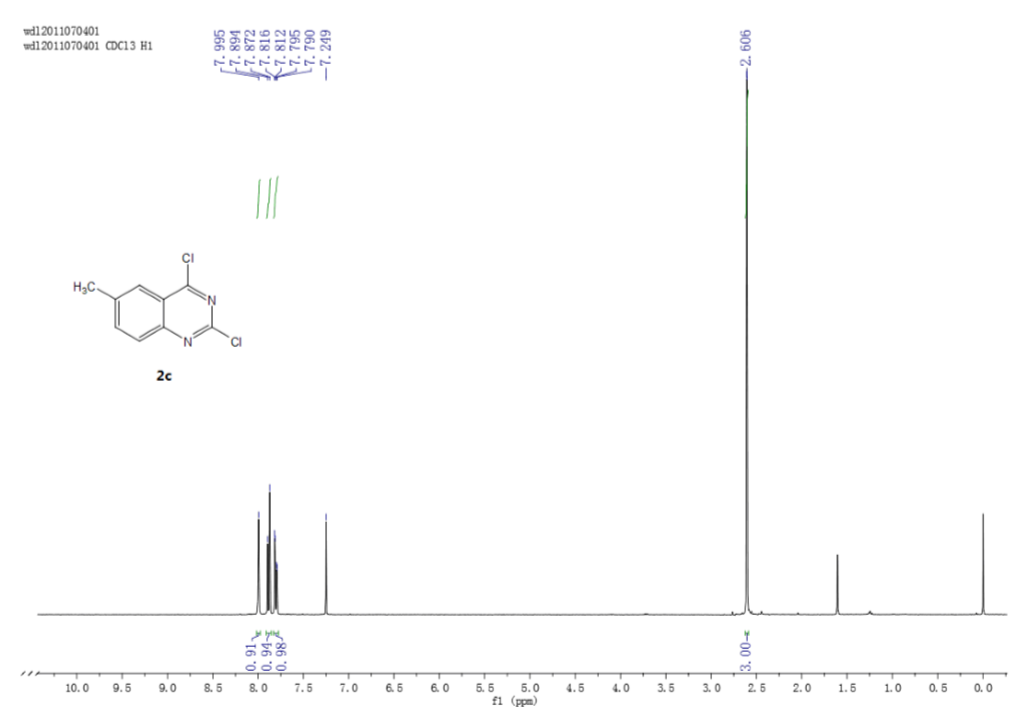


**Figure S 6:** 13C NMR of **2c**


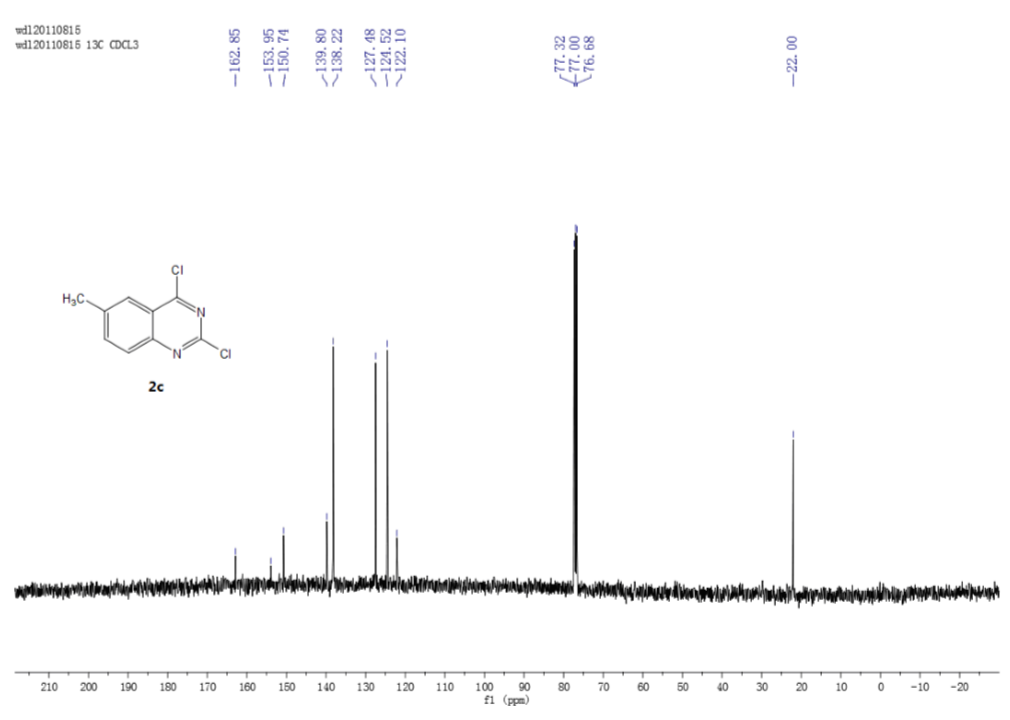


**Figure S 7:** 1H NMR of **2d**


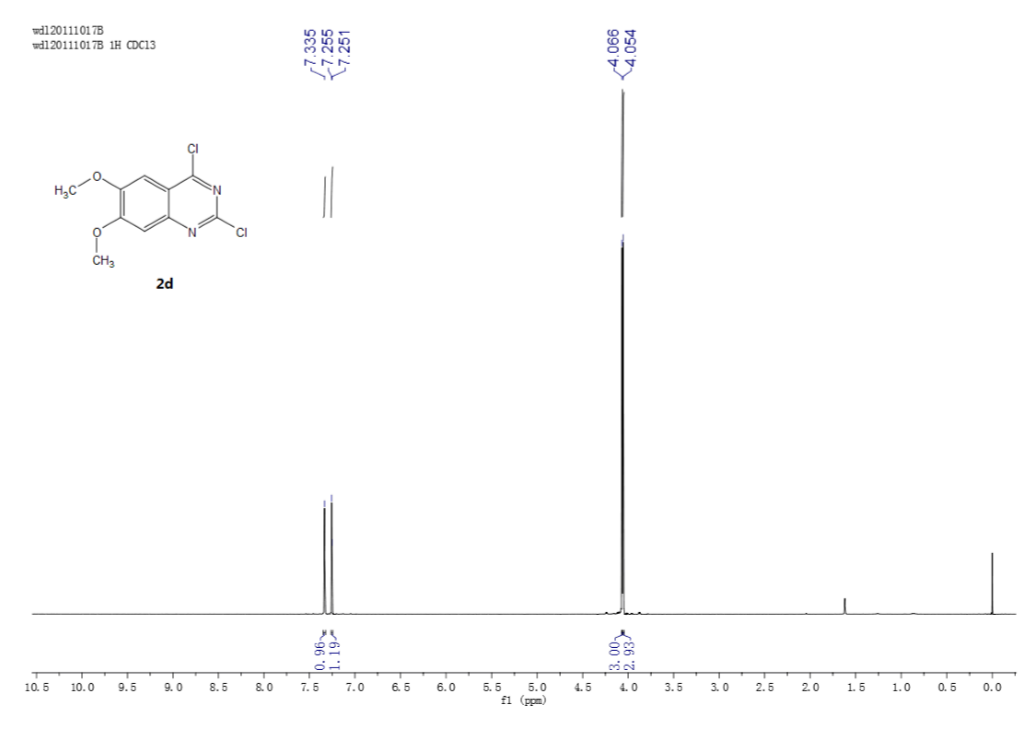


**Figure S 8:** 13C NMR of **2d**


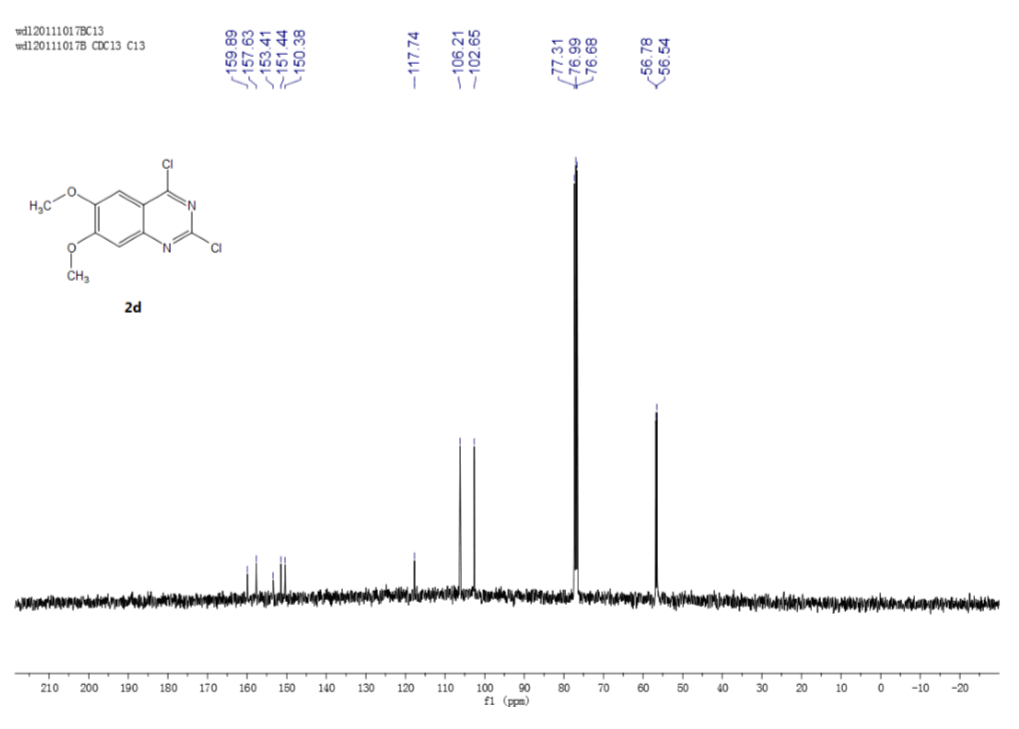


**Figure S 9:** 1H NMR of **2e**


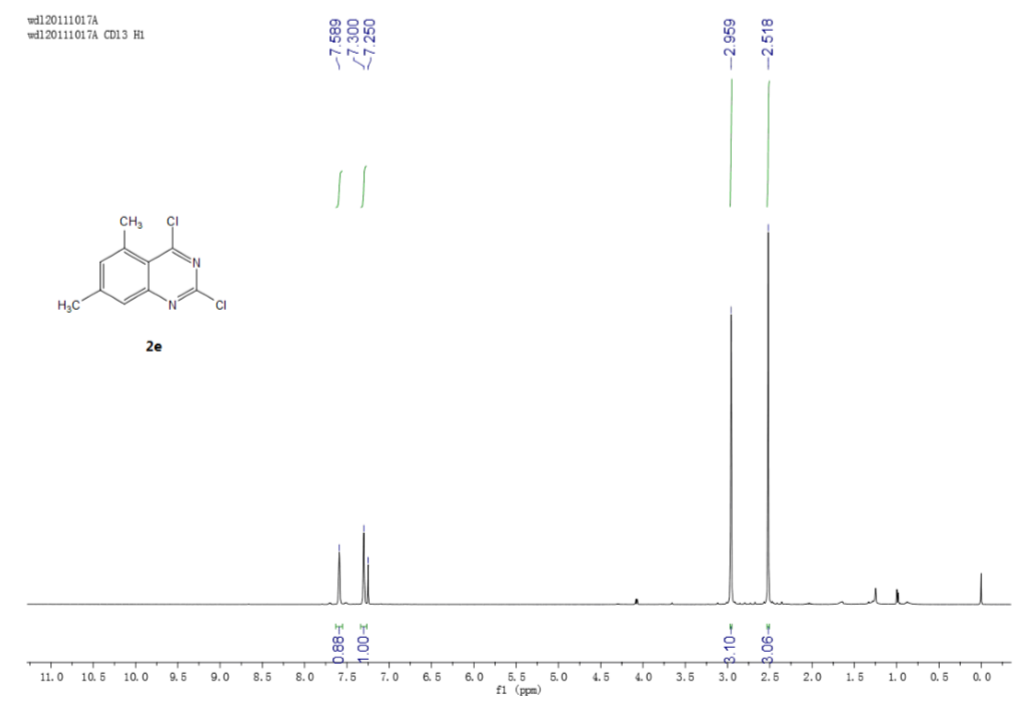


**Figure S 10:** 13C NMR of **2e**


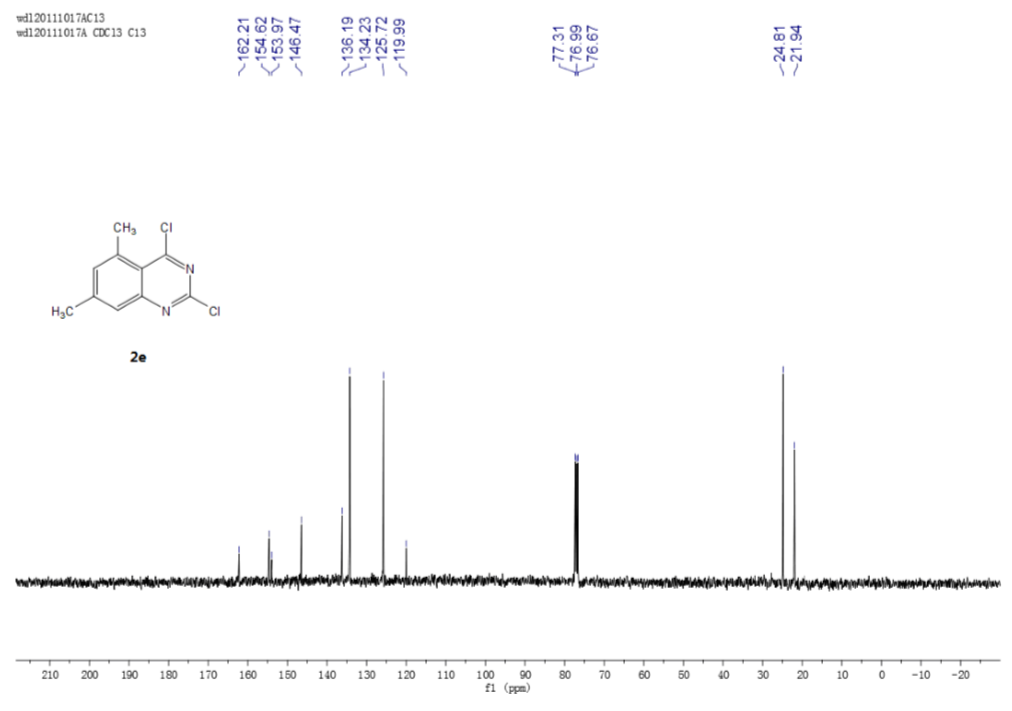


**Figure S 11:** 1H NMR of **2f**


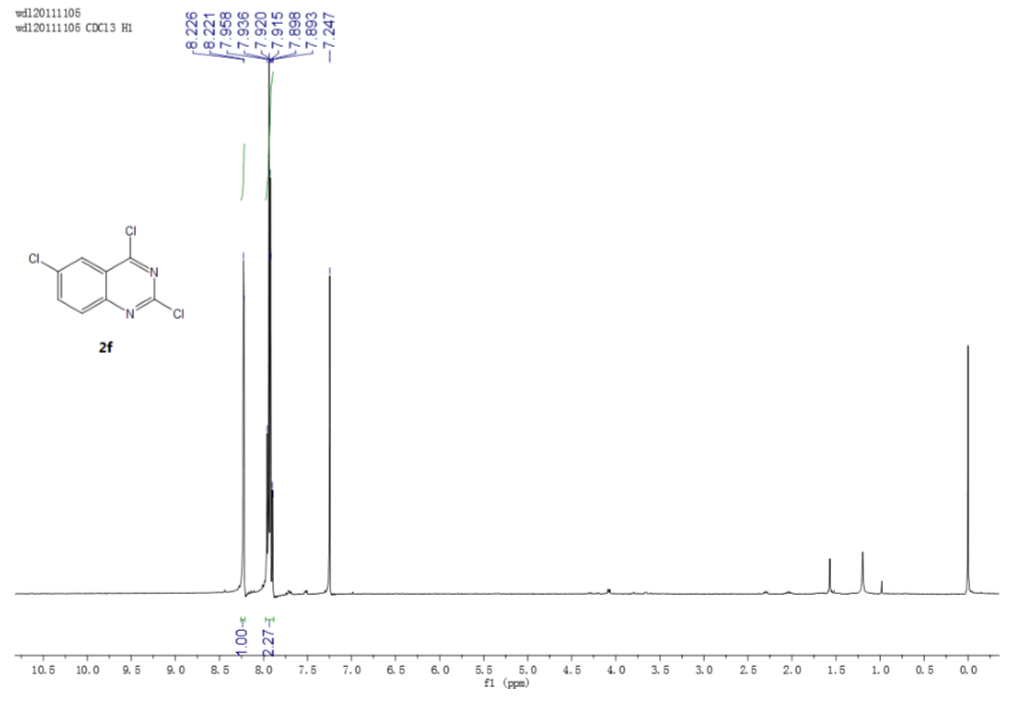


**Figure S 12:** 13C NMR of **2f**


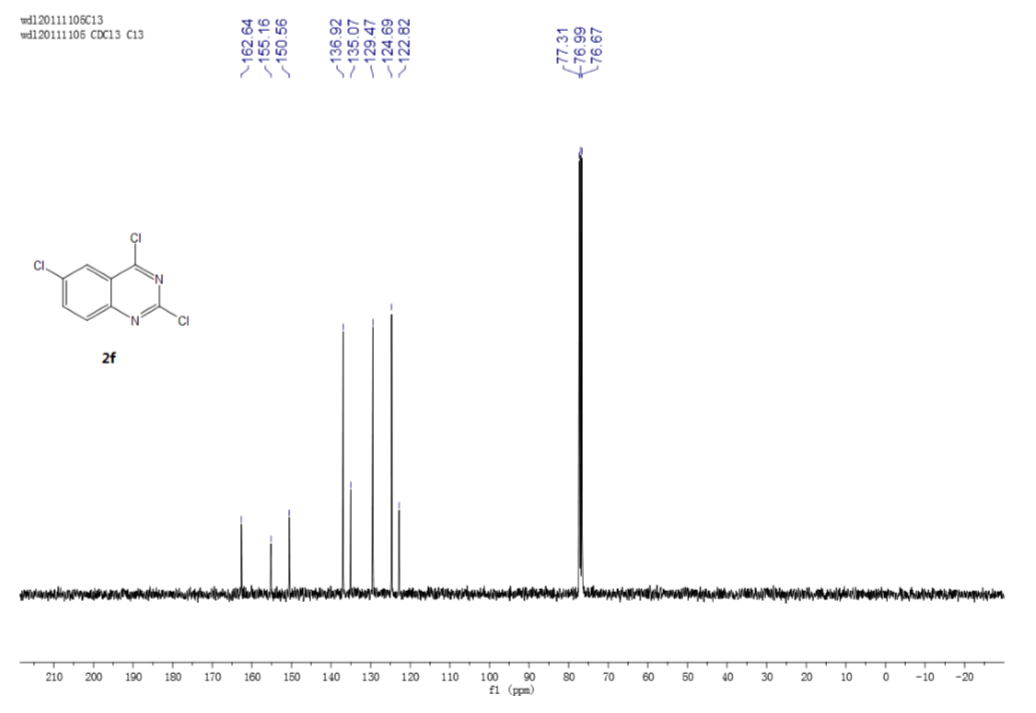


**Figure S 13:** 1H NMR of **2g**


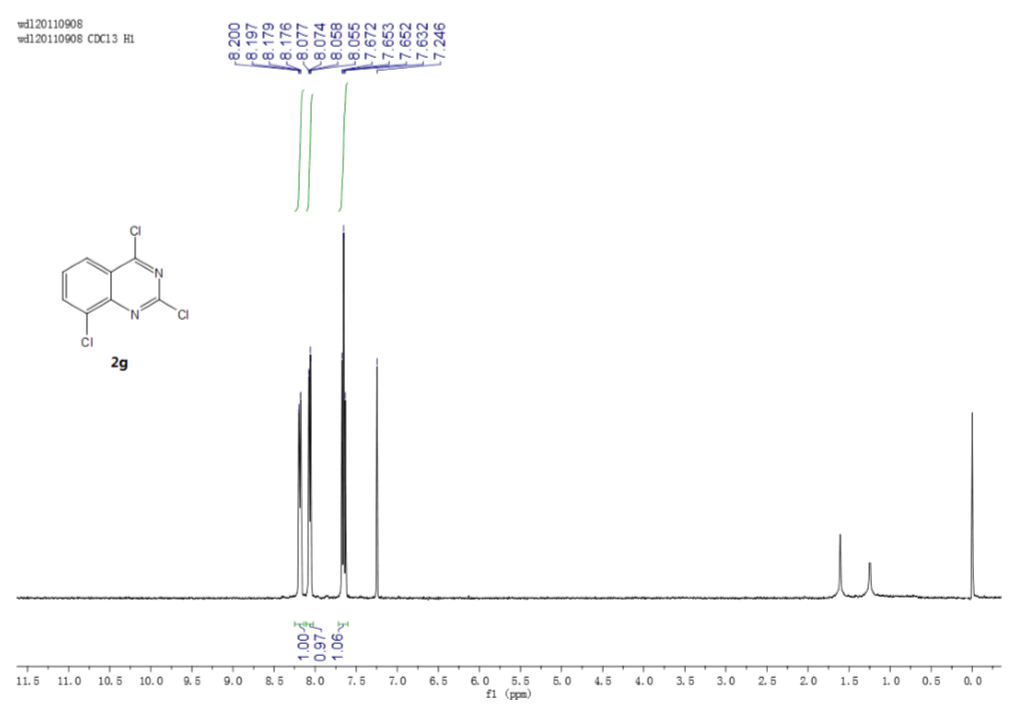


**Figure S 14:** 13C NMR of **2g**


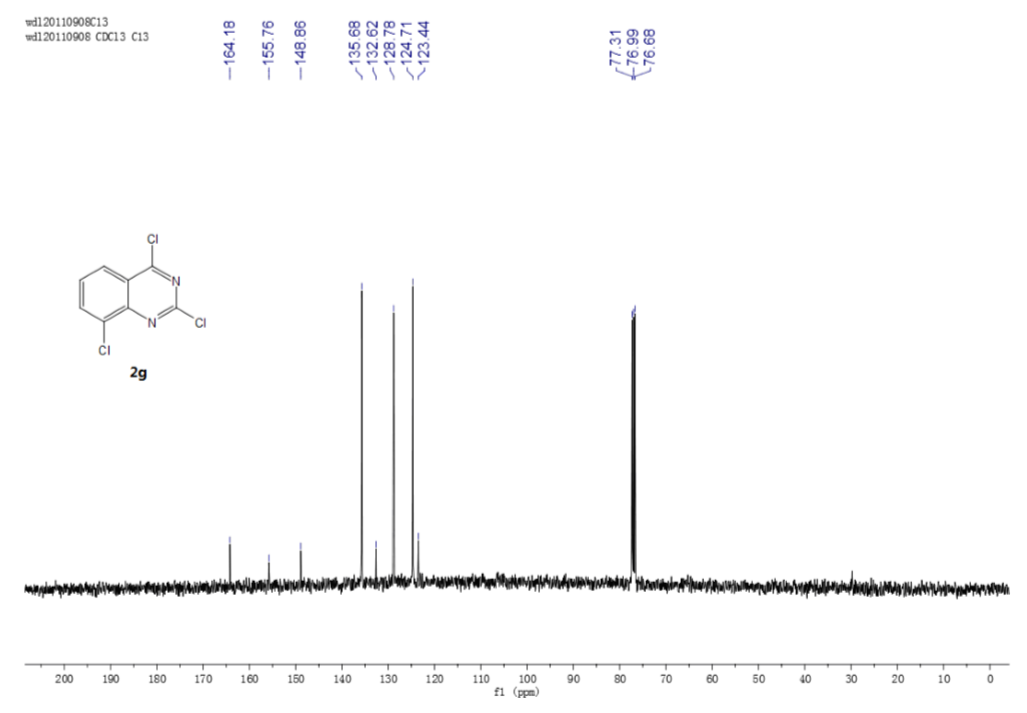


**Figure S 15:** 1H NMR of **2h**


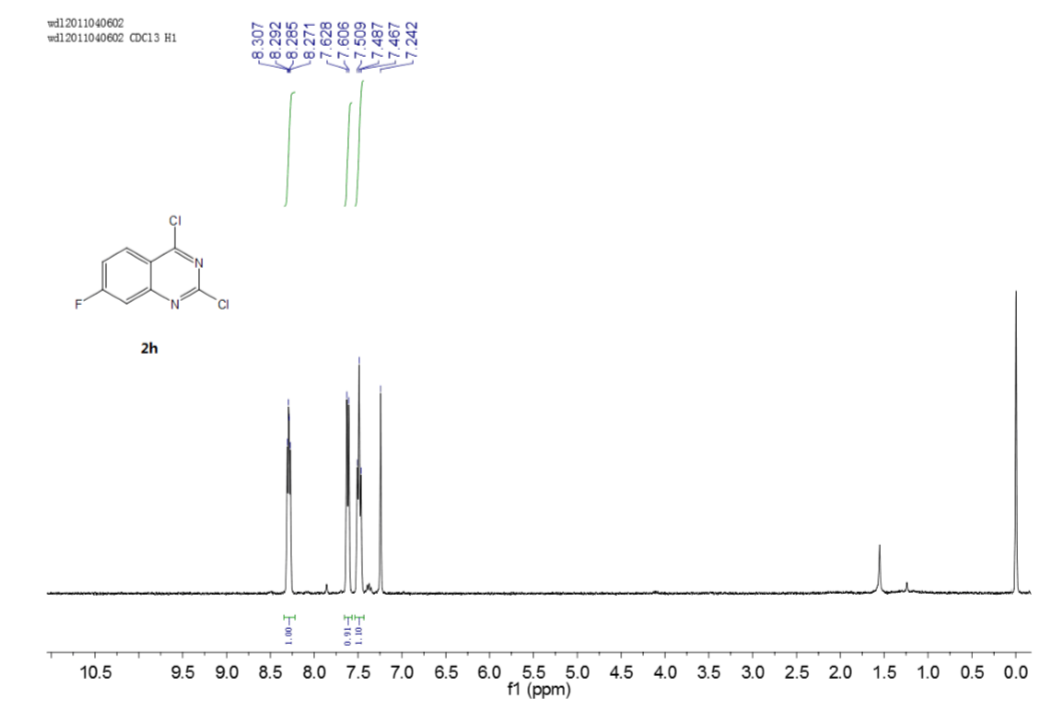


**Figure S 16:** 13C NMR of **2h**


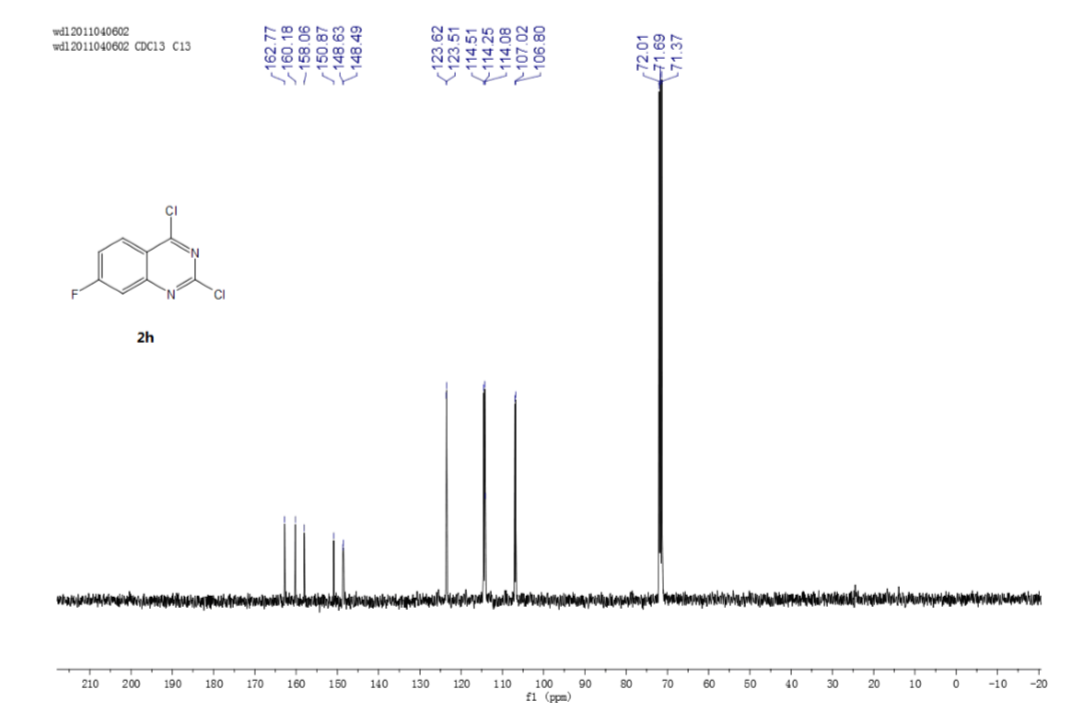


**Figure S 17:** 1H NMR of **2i**


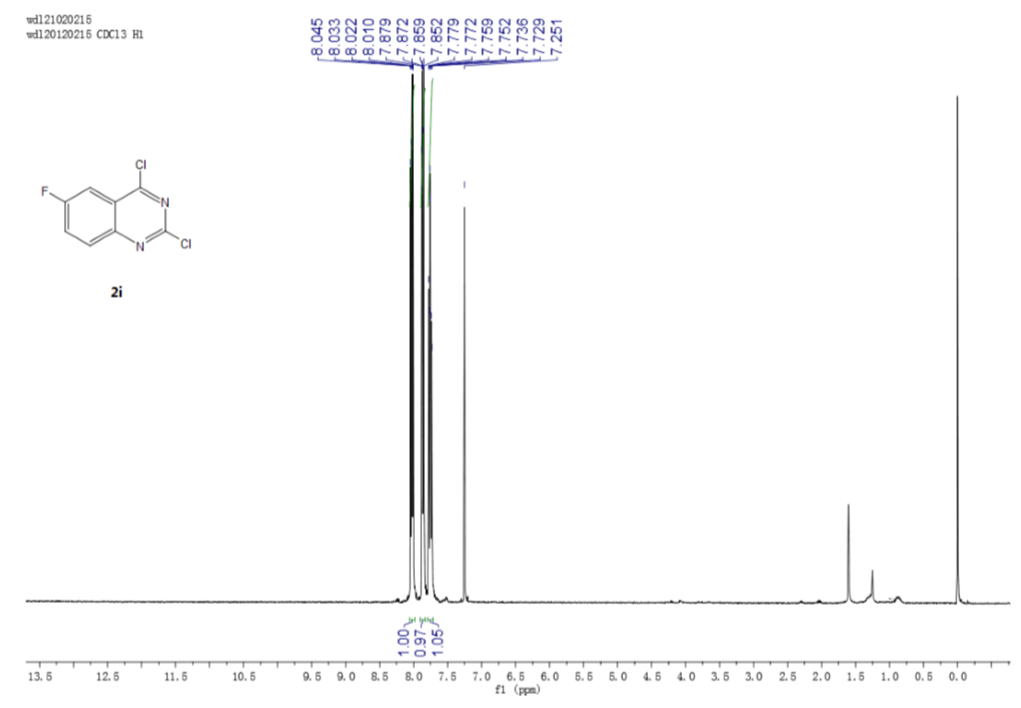


**Figure S 18:** 13C NMR of **2i**


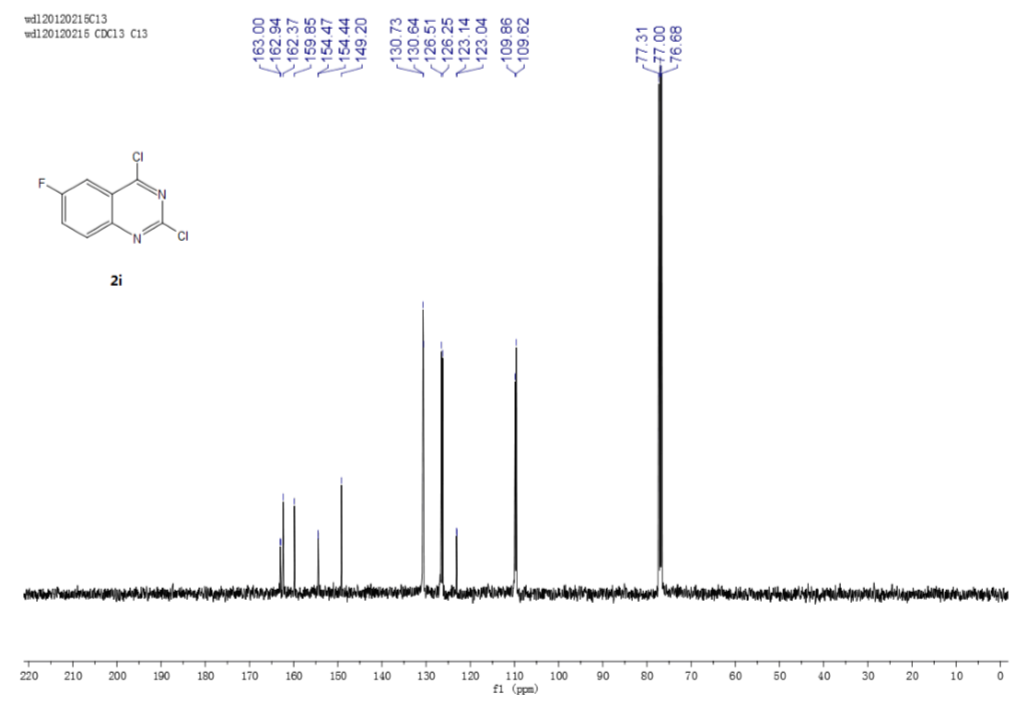


**Figure S 19:** 1H NMR of **2j**


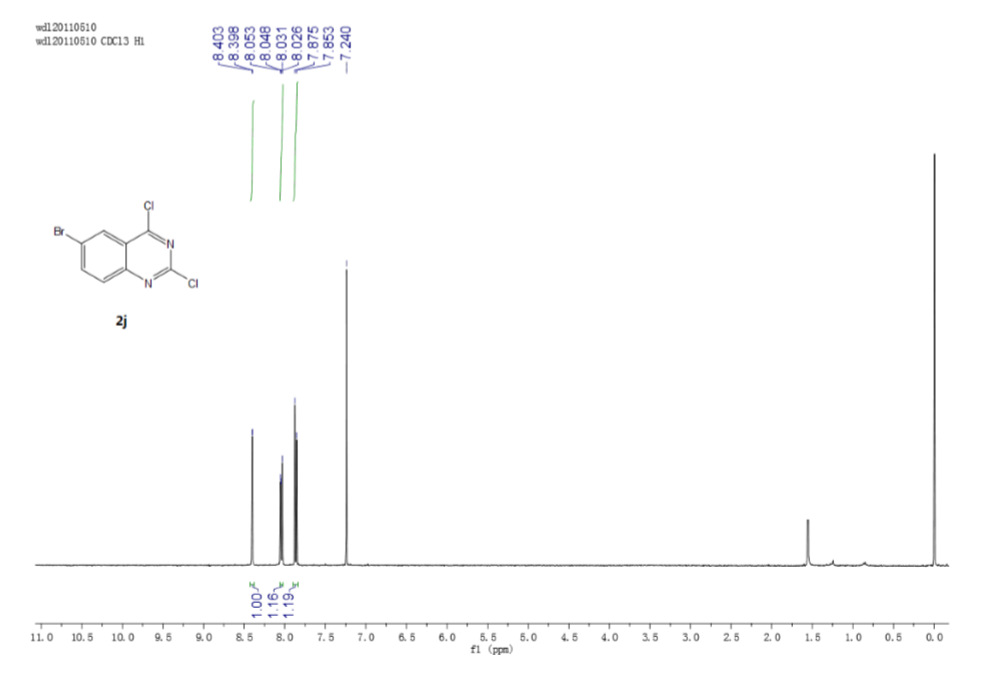


**Figure S 20:** 13C NMR of **2j**


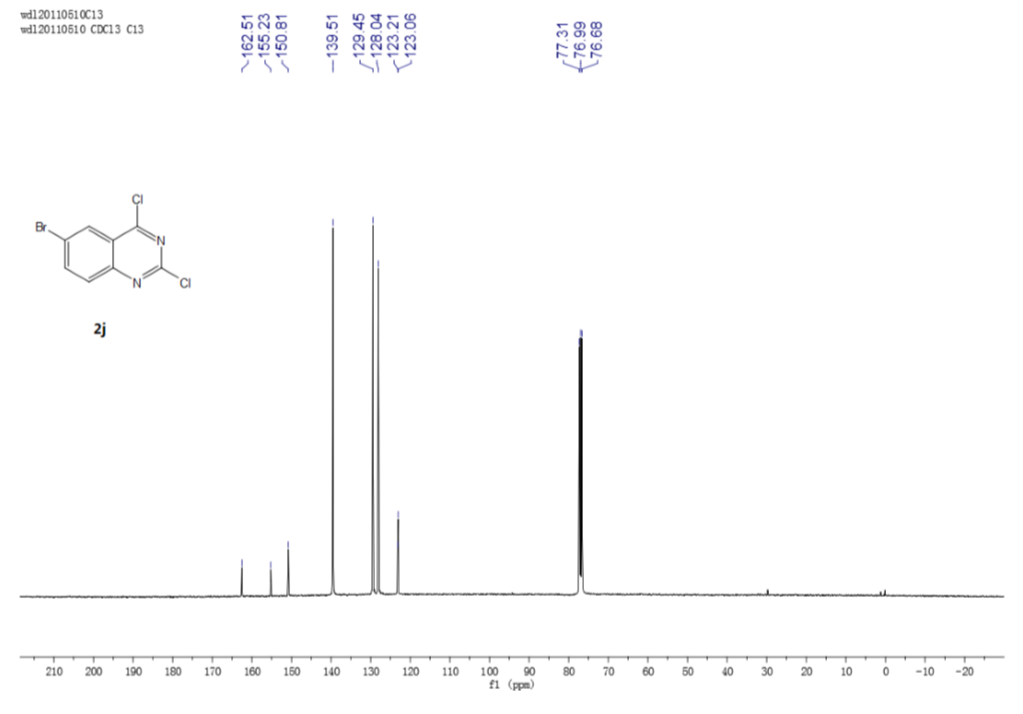


**Figure S 21:** 1H NMR of **2k**


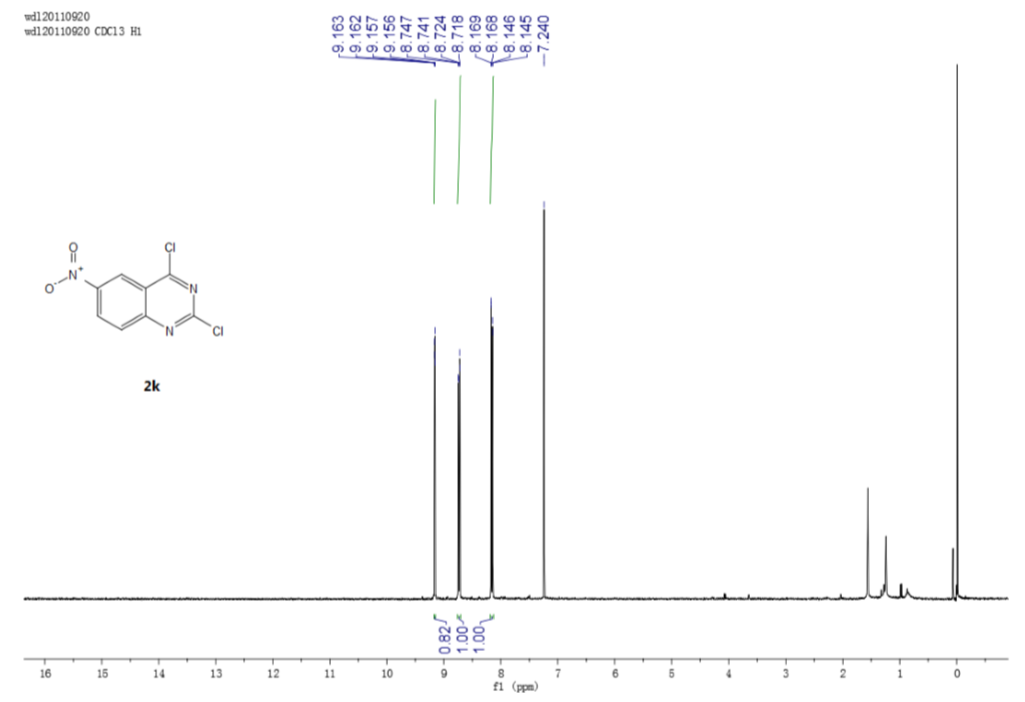


**Figure S 22:** 13C NMR of **2k**


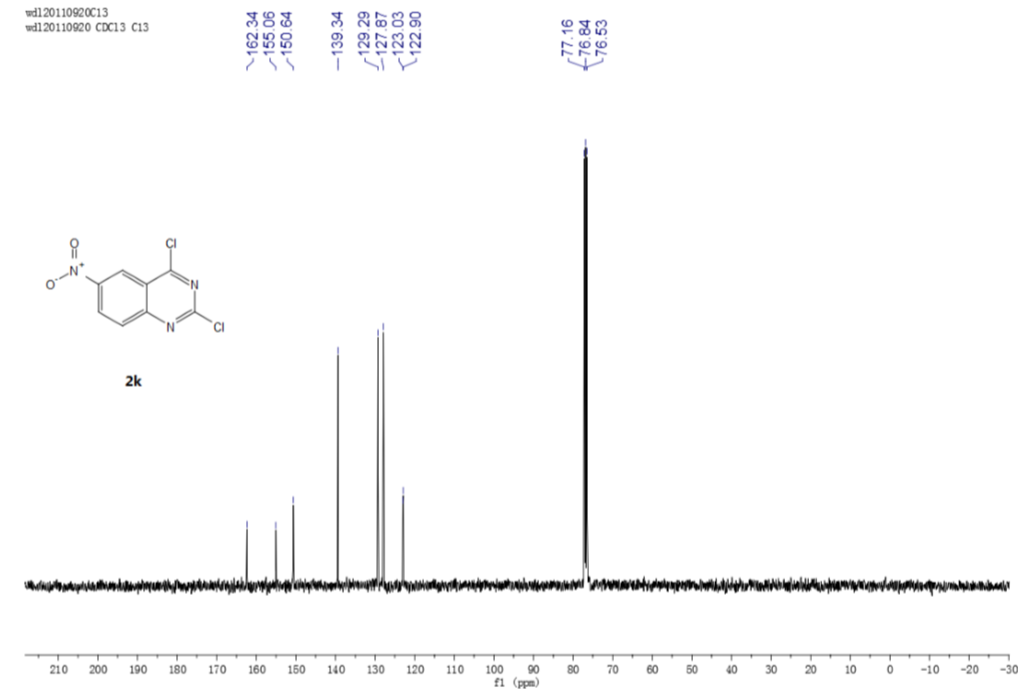


**Figure S 23:** 1H NMR of **2l**


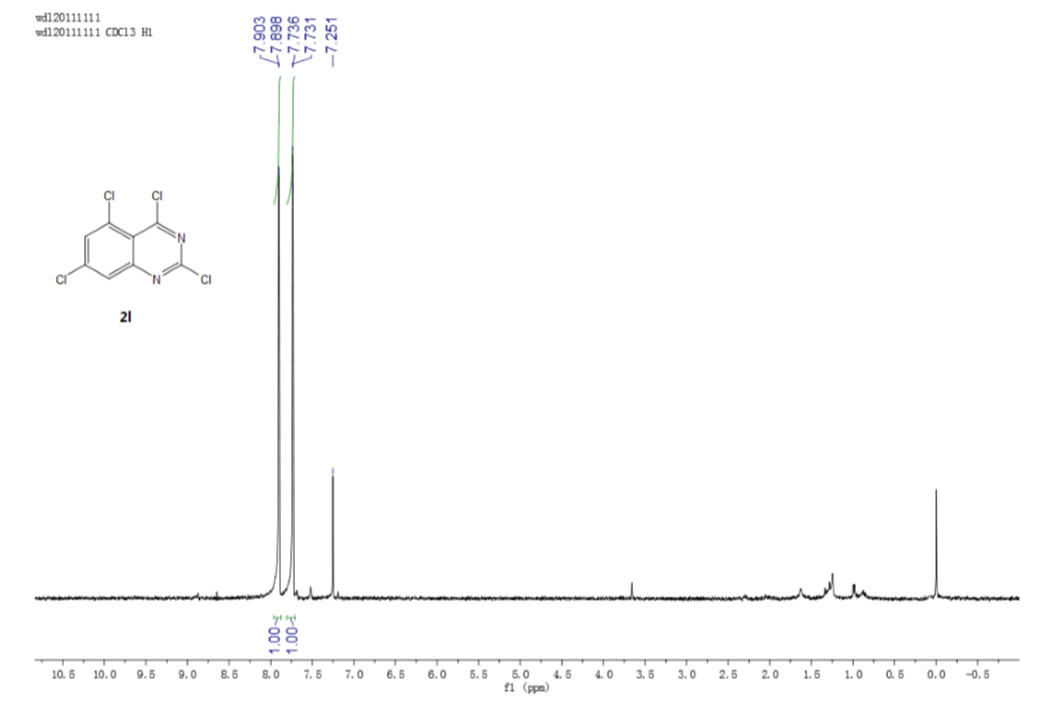


**Figure S 24:** 13C NMR of **2l**


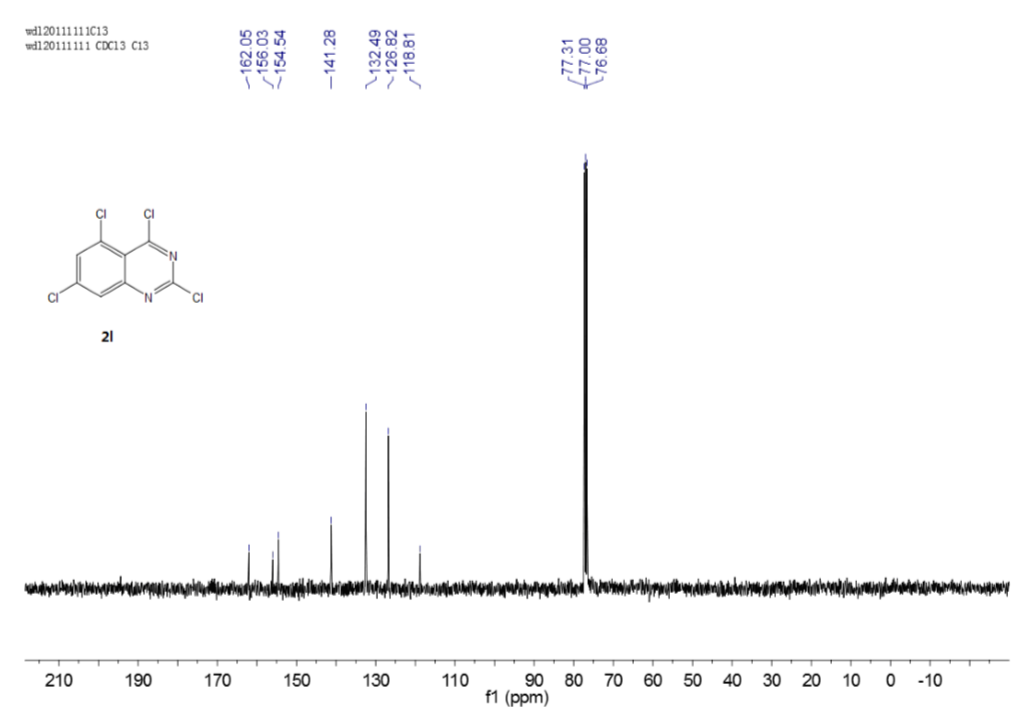


**Figure S 25:** 1H NMR of **2m**

**Figure S 26:** 13C NMR of **2m**

**Figure S 27:** 1H NMR of **2n**

**Figure S 28:** 13C NMR of **2n**

**Figure S 29:** 1H NMR of **3b**

**Figure S 30:** 1H NMR of **3c**

**Figure S 31:** 1H NMR of **3d**

**Figure S 32:** 1H NMR of **3d**

**References**

[1] Smits R. A., de Esch I. J., Zuiderveld O. P., Broeker J., Sansuk K., Guaita E., Coruzzi G., Adami M., Haaksma E., Leurs R. Discovery of quinazolines as histamine h4 receptor inverse agonists using a scaffold hopping approach. J. Med. Chem. **2008**, 51, 7855-7865. doi: 10.1021/jm800876b

[2] Yokoyama K., Ishikawa N., Igarashi S., Kawano N., Hattori K., Miyazaki T., Ogino S., Matsumoto Y., Takeuchi M., Ohta M. Discovery of potent ccr4 antagonists: Synthesis and structure-activity relationship study of 2,4-diaminoquinazolines. Bioorg. Med. Chem. **2008**, 16, 7021-7032. doi: 10.1016/j.bmc.2008.05.036

[3] Okano M., Mito J., Maruyama Y., Masuda H., Niwa T., Nakagawa S., Nakamura Y., Matsuura A. Discovery and structure-activity relationships of 4-aminoquinazoline derivatives, a novel class of opioid receptor like-1 (orl1) antagonists. Bioorg. Med. Chem. **2009**, 17, 119-132. doi: 10.1016/j.bmc.2008.11.012

[4] Hess H. J., Cronin T. H., Scriabine A. Antihypertensive 2-amino-4(3h)-quinazolinones. J. Med. Chem. **1968**, 11, 130-136. doi: 10.1021/jm00307a028

[5] Zhong W., Wu D., Li Z. Facile and efficient cyclization of anthranilonitrile to 2,4-dichloroquinazoline by bis(trichloromethyl) carbonate and catalytic amount triphenylphosphine oxide. Heterocycles **2012**, 85. doi: 10.3987/com-12-12466

[6] Abbott J. R., Patel P. A., Howes J. E., Akan D. T., Kennedy J. P., Burns M. C., Browning C. F., Sun Q., Rossanese O. W., Phan J. et al. Discovery of quinazolines that activate sos1-mediated nucleotide exchange on ras. ACS Med. Chem. Lett. **2018**, 9, 941-946. doi: 10.1021/acsmedchemlett.8b00296

[7] Denton R. M., An J., Adeniran B., Blake A. J., Lewis W., Poulton A. M. Catalytic phosphorus(v)-mediated nucleophilic substitution reactions: Development of a catalytic appel reaction. J. Org. Chem. 2011, 76, 6749-6767. doi: 10.1021/jo201085r
